# Supplementary material
Source: PubMed Central journal article supplement (PMC4409697)
Supplement: NIHMS674910-supplement-Table_S1.pdf [file NIHMS674910-supplement-Table_S1.pdf]

Table S1. Collection localities and Genbank accession numbers for cytochrome *b* sequences used for species-level analyses of *Peromyscus maniculatus*. Phylogenetic relationships and geographic distributions of clades are shown in Figure 1.

| LOCALITY               | CLADE(S) | GENBANK ACCESSION #                                                                                                                                                                                                                                                        |
|------------------------|----------|----------------------------------------------------------------------------------------------------------------------------------------------------------------------------------------------------------------------------------------------------------------------------|
| Marin Co.,<br>CA       | 1        | EU006766, EU006767, EU006768,<br>EU006769, EU006770, EU006771, EU00672                                                                                                                                                                                                     |
| Monterey Co.,<br>CA    | 3        | EF666142                                                                                                                                                                                                                                                                   |
| Merced Co.,<br>CA      | 1,3      | EF666144, EF666145, EF666146, EF666147,<br>EF666148, EF666149, EF666150, EF666151,<br>EF666152, EF666153                                                                                                                                                                   |
| Tuolumne<br>Co., CA    | 1,3      | EF666154, EF666155, EF666156, EF666157,<br>EF666158, EF666159, EF666160, EF666161,<br>EF666162, EF666163, EF666164, EF666165,<br>EF666166, EF666167, EF666168, EF666169,<br>EF666170, EF666171, EF666172, EF666173,<br>EF666174, EF666175, EF666176, EF666177,<br>EF666178 |
| Santa Clara<br>Co., CA | 3        | EF666143                                                                                                                                                                                                                                                                   |
| Mono Co.,<br>CA        | 1,3      | EF666179, EF666180, EF666181, EF666182,<br>EF666183, EF666184                                                                                                                                                                                                              |
| White Pine<br>Co., NV  | 1        | EF666185, EF666186, EF666187, EF666188,<br>EF666189, EF666190, EF666191, EF666192,<br>EF666193, EF666194, EF666195, EF666196                                                                                                                                               |
| Clear Creek<br>Co., CO | 1        | EF666227, EF666228, EF666229, EF666230,<br>EF666231, EF666232, EF666233, EF666234,<br>EF666235, EF666236, EF666237, EF666238,<br>EF666239, EF666240, EF666241                                                                                                              |
| Yuma Co.,<br>CO        | 1,2      | EF666212, EF666213, EF666214, EF666215,<br>EF666216, EF666217, EF666218, EF666219,<br>EF666220, EF666221, EF666222, EF666223,<br>EF666224, EF666225, EF666226                                                                                                              |
| Boulder Co.,<br>CO     | 1        | EF666255, EF666256, EF666257, EF666258,<br>EF666270, EF666271, EF666272, EF666273,<br>EF666274, EF666275, EF666276, EF666277                                                                                                                                               |
| Pawnee Co.,<br>KS      | 2        | EF666197, EF666198, EF666199, EF666200,<br>EF666201, EF666202, EF666203, EF666203,<br>EF666204, EF666205, EF666206, EF666207,<br>EF666208, EF666209, EF666210, EF666211                                                                                                    |
| Weld Co., CO           | 1        | EF666242, EF666243, EF666244, EF666245,<br>EF666246, EF666247, EF666248, EF666249,<br>EF666250, EF666251, EF666252                                                                                                                                                         |
| British<br>Columbia,   | 1        | DQ385698, DQ385699, DQ385700,<br>DQ385701, DQ385702                                                                                                                                                                                                                        |

|                          |   |                                                                                                                                                                                                                                                                                                                                                    |
|--------------------------|---|----------------------------------------------------------------------------------------------------------------------------------------------------------------------------------------------------------------------------------------------------------------------------------------------------------------------------------------------------|
| Canada                   |   |                                                                                                                                                                                                                                                                                                                                                    |
| Labrador,<br>Canada      | 5 | DQ385809, DQ385810, DQ385811,<br>DQ385812, DQ385813, DQ385814,<br>DQ385815                                                                                                                                                                                                                                                                         |
| Manitoba,<br>Canada      | 6 | DQ385723, DQ385724, DQ385725,<br>DQ385726, DQ385727, DQ385728,<br>DQ385729, DQ385730, DQ385731,<br>DQ385732, DQ385733                                                                                                                                                                                                                              |
| Ontario,<br>Canada       | 5 | DQ385734, DQ385735, DQ385770,<br>DQ385771, DQ385772, DQ385773,<br>DQ385774, DQ385775, DQ385776,<br>DQ385777, DQ385778, DQ385779,<br>DQ385780, DQ385781, DQ385782                                                                                                                                                                                   |
| Quebec,<br>Canada        | 5 | DQ385783, DQ385784, DQ385785,<br>DQ385805, DQ385806, DQ385807,<br>DQ385808, DQ385749, DQ385750,<br>DQ385751, DQ385752, DQ385753,<br>DQ385800, DQ385801, DQ385802,<br>DQ385803, DQ385804, DQ385795,<br>DQ385796, DQ385797, DQ385798,<br>DQ385799, DQ385792, DQ385793,<br>DQ385794, DQ385789, DQ385790,<br>DQ385791, DQ385786, DQ385787,<br>DQ385788 |
| Baja CA,<br>Mexico       | 3 | DQ385706, DQ385707, DQ385708,<br>DQ385709                                                                                                                                                                                                                                                                                                          |
| Humboldt<br>Co., CA      | 1 | DQ385703, DQ385704, DQ385705                                                                                                                                                                                                                                                                                                                       |
| Santa Barbara<br>Co., CA | 3 | DQ385711, DQ385712, DQ385710,<br>DQ385713, DQ385714                                                                                                                                                                                                                                                                                                |
| Ada Co., ID              | 1 | DQ385672, DQ385673, DQ385674,<br>DQ385675                                                                                                                                                                                                                                                                                                          |
| Des Moines<br>Co., IA    | 2 | DQ385633, DQ385634, DQ385635,<br>DQ385636, DQ385637                                                                                                                                                                                                                                                                                                |
| Penobscot<br>Co., ME     | 6 | DQ385754, DQ385755, DQ385756                                                                                                                                                                                                                                                                                                                       |
| Cass Co., MN             | 6 | DQ385736, DQ385737, DQ385738,<br>DQ385739                                                                                                                                                                                                                                                                                                          |
| Keweenaw<br>Co., MI      | 1 | DQ385643, DQ385644, DQ385645                                                                                                                                                                                                                                                                                                                       |
| Mackinac Co.,<br>MI      | 5 | DQ385821, DQ385822, DQ385823,<br>DQ385824, DQ385825, DQ385826,<br>DQ385827                                                                                                                                                                                                                                                                         |
| Gallatin Co.,<br>MT      | 1 | DQ385676, DQ385677, DQ385678,<br>DQ385679                                                                                                                                                                                                                                                                                                          |

|                       |                                  |                                                                                                             |
|-----------------------|----------------------------------|-------------------------------------------------------------------------------------------------------------|
| Churchill Co.,<br>NV  | 1                                | DQ385715, DQ385680, DQ385681,<br>DQ385682                                                                   |
| Hidalgo Co.,<br>NM    | 2,4                              | DQ385718, DQ385719, DQ385720,<br>DQ385721                                                                   |
| Bernalillo Co.,<br>NM | 2                                | DQ385753, DQ385754, DQ385655,<br>DQ385756                                                                   |
| San Juan Co.,<br>NM   | 2                                | DQ385667, DQ385668, DQ385669,<br>DQ385670, DQ385671                                                         |
| Catron Co.,<br>NM     | 2                                | DQ385651, DQ385652                                                                                          |
| Otero Co.,<br>NM      | 2,4                              | DQ385658, DQ385659, DQ385660,<br>DQ385661, DQ385662, DQ385663,<br>DQ385664, DQ385665, DQ385666,<br>DQ385722 |
| Roosevelt Co.,<br>NM  | 2,4                              | DQ385628, DQ385629, DQ385630,<br>DQ385631, DQ385632                                                         |
| Sullivan Co.,<br>NY   | 6                                | DQ385740, DQ385741, DQ385742                                                                                |
| Clinton Co.,<br>NY    | 6                                | DQ385746, DQ385747, DQ385748                                                                                |
| Somerset Co.,<br>PA   | 6                                | DQ385762, DQ385763, DQ385764,<br>DQ385765, DQ385766                                                         |
| Sevier Co.,<br>TN     | 5                                | DQ385816, DQ385817, DQ385818                                                                                |
| Unicoi Co.,<br>TN     | 6                                | DQ385767, DQ385768, DQ385769,<br>DQ385819, DQ385820                                                         |
| Salt Lake Co.,<br>UT  | 1                                | DQ385684, DQ385685, DQ385686,<br>DQ385687, DQ385688                                                         |
| Madison Co.,<br>VA    | 6                                | DQ385757, DQ385758, DQ385759,<br>DQ385760, DQ385761                                                         |
| King Co., WA          | 1                                | DQ385696                                                                                                    |
| Kittitas Co.,<br>WA   | 1                                | DQ385689                                                                                                    |
| Pierce Co.,<br>WA     | 1                                | DQ385697, DQ385716                                                                                          |
| Snohomish<br>Co., WA  | 1                                | DQ385695                                                                                                    |
| Kitsap Co.,<br>WA     | 1                                | DQ385694                                                                                                    |
| Cochise Co.,<br>AZ    | <i>Peromyscus<br/>melanotis</i>  | EU574689-EU574701                                                                                           |
| Leon Co.,<br>FL       | <i>Peromyscus<br/>gossypinus</i> | DQ385624, DQ385225                                                                                          |
