# Supplementary material
Source: PubMed Central journal article supplement (PMC4409697)
Supplement: NIHMS674910-supplement-Table_S2.pdf [file NIHMS674910-supplement-Table_S2.pdf]

Table S2. Species identities and Genbank accession numbers for cytochrome *b* sequences used in genus-level analyses of *Peromyscus*, along with information about altitudinal distributions. “Low elevation” refers to species generally found below 1000m, “High elevation” refers to species generally found above 2500m, “Intermediate elevation” refers to species found between 1000m and 2500m.

| Species ID                                                                        | Genbank ID                                   | Distribution*                                                                                                                                                                                                        | References |
|-----------------------------------------------------------------------------------|----------------------------------------------|----------------------------------------------------------------------------------------------------------------------------------------------------------------------------------------------------------------------|------------|
| <i>P. beatae</i>                                                                  | AF131914<br>AF131921                         | <b>Intermediate to high elevation</b><br>Humid forests of Mexico and Central America                                                                                                                                 | 1          |
| <i>P. levipes</i>                                                                 | AF155396<br>AF131928                         | <b>Intermediate to high elevation</b><br>Central America and the Sierra Madre of Mexico                                                                                                                              | 1,2        |
| <i>P. schmidlyi</i>                                                               | AY322522                                     | <b>High elevation</b><br>Pine-oak forests of Durango, Mexico                                                                                                                                                         | 3          |
| <i>P. boylii</i>                                                                  | AF131915<br>AF155388<br>AF155387<br>AF155392 | <b>High elevation</b><br>Chaparral, pinyon-juniper woodlands and pine-oak forests of the western US and Sierra Madre Occidental, Mexico                                                                              | 4,5        |
| <i>P. simulus</i>                                                                 | AAG25892                                     | <b>Low elevation</b><br>Coastal lowlands, plains, and river valleys of Sinaloa and Nayarit, Mexico                                                                                                                   | 1,6        |
| <i>P. stephani</i>                                                                | AAD43126                                     | <b>Low elevation</b><br>Desert islands in the sea of Cortez, Mexico                                                                                                                                                  | 1,2        |
| <i>P. spiceligus</i>                                                              | AAQ83477                                     | <b>Low to intermediate elevation</b><br>Sierra Madre Occidental, West-central Mexico                                                                                                                                 | 1,7        |
| <i>P. winkelmanni</i>                                                             | AAG25895                                     | <b>High elevation</b><br>Montane oak and pine forests of west-central Mexico (Guererro and Michoacán)                                                                                                                | 1,8        |
| <i>P. sagax</i>                                                                   | AAD43119                                     | <b>Intermediate elevation</b>                                                                                                                                                                                        | 2          |
| <i>P. truei</i><br>( <i>comanche</i> ,<br><i>montipinoris</i> ,<br><i>truei</i> ) | AF155412<br>AY376434<br>AY376431<br>AY376432 | <b>Low to high elevation</b><br>Central Oregon to southern Mexico, California to western Texas.<br>( <i>P.t. comanche</i> : Texas,<br><i>montipinoris</i> : southcentral California, <i>truei</i> : southwestern US) | 1,5,9      |

|                                                                                                                                 |                                                                      |                                                                                                                                                                                       |        |
|---------------------------------------------------------------------------------------------------------------------------------|----------------------------------------------------------------------|---------------------------------------------------------------------------------------------------------------------------------------------------------------------------------------|--------|
| <i>P. gratus</i>                                                                                                                | AAS45263                                                             | <b>High elevation</b><br>Mountains of southwestern New Mexico and central Mexico                                                                                                      | 5      |
| <i>P. difficilis</i>                                                                                                            | AAS45259                                                             | <b>High elevation</b><br>Rocky forested areas, Colorado, US to Oaxaca, Mexico                                                                                                         | 1, 2   |
| <i>P. nasutus</i>                                                                                                               | AAS45265                                                             | <b>Intermediate elevation</b><br>Rocky outcrops and among boulders in pinyon-juniper-oak woodland in New Mexico, eastern Arizona, western Texas, central Colorado and Northern Mexico | 1,5    |
| <i>P. attwateri</i>                                                                                                             | AAD43100                                                             | <b>Low elevation</b><br>Rocky habitats in central Texas, Oklahoma, and Arkansas, US                                                                                                   | 1,5,10 |
| <i>P. pectoralis</i>                                                                                                            | AAS45266                                                             | <b>Intermediate elevation</b><br>Rocky terrain in the Central Plateau and Sierra Madre of Mexico, comparable areas in Texas, New Mexico, and Oklahoma                                 | 1,11   |
| <i>P. melanophries</i>                                                                                                          | AAQ83475                                                             | <b>Intermediate elevation</b><br>Dry rocky habitats within the Mexican Plateau, southern Durango and Coahuila through Oaxaca                                                          | 1,12   |
| <i>P. zarhynchus</i>                                                                                                            | AAP34316                                                             | <b>Intermediate to high elevation</b><br>cloud forests of Chiapas, Mexico                                                                                                             | 13     |
| <i>P. maniculatus</i><br>( <i>gambelli</i> ,<br><i>coolidgei</i> , <i>rufinus</i> ,<br><i>sonoriensis</i> ,<br><i>blandus</i> ) | EF666175<br>DQ385707<br>DQ385714<br>EF666232<br>DQ785703<br>DQ385721 | <b>Low to high elevation</b><br>Across most of North America into central Mexico; see text of this manuscript for further discussion and references                                   | 1,4,5  |
| <i>P. keeni</i>                                                                                                                 | DQ385716                                                             | <b>Low to high elevation</b><br>Coastal lowlands to sub-alpine forests, Pacific Northwestern US and British Columbia                                                                  | 5      |
| <i>P. melanotis</i>                                                                                                             | AF155398                                                             | <b>High elevation</b><br>Pine–fir forest and grasslands, central Mexico and southeastern Arizona                                                                                      | 1      |
| <i>P. leucopus</i>                                                                                                              | AF131926                                                             | <b>Low to high elevation</b><br>Mature forests, and marshes, eastern US and eastern Mexico                                                                                            | 1, 14  |
| <i>P. californicus</i>                                                                                                          | AAD43108                                                             | <b>Low to intermediate elevations</b><br>Foothills of coastal Californian ranges and the Sierra Nevada                                                                                | 1,5,15 |

|                                        |          |                                                                                                                                |        |
|----------------------------------------|----------|--------------------------------------------------------------------------------------------------------------------------------|--------|
| <i>P. eremicus</i>                     | AAQ83468 | <b>Low to intermediate elevations</b><br>Desert shrub and riparian habitats<br>in Northern Mexico, Baja and<br>Southwestern US | 1,5,16 |
| <i>P. crinitus</i>                     | AAS45253 | <b>Low to high elevation</b><br>Canyons in western US and<br>Northern Baja, Mexico                                             | 1,17   |
| <i>P. polius</i>                       | AF155403 | <b>High elevation</b><br>West-central Chihuahua, México                                                                        | 2      |
| <i>Reithrodontomys<br/>raviventris</i> | AY859470 | <b>Low elevation</b><br>Salt Marshes of the San Francisco<br>Bay Area, US                                                      | 18     |
| <i>R. tenuirostris</i>                 | AY859463 | <b>High elevation</b><br>Evergreen Cloud forest in Chiapas,<br>Mexico and Guatemala                                            | 19     |

#### References

- [1] Carleton MD (1989). Systematics and evolution. In: Kirkland GL and Layne JN (eds). *Advances in the study of Peromyscus (Rodentia)*, Texas Tech University Press: Lubbock, Texas. pp 7–141.
- [2] Wilson DE, and Reeder DM (eds). (2005). *Mammal Species of the World. A Taxonomic and Geographic Reference* (3rd ed). Smithsonian Institution Press, Washington, D.C. 2,142 pp.
- [3] Bradley RD, Carroll DS, Haynie ML, Muñiz Martínez R, Hamilton MJ, and Kilpatrick CW (2004). A new species of *Peromyscus* from western Mexico. *J Mammal* **85**: 1184–1193.
- [4] Hall, ER (1981) *Mammals of North America* (vol. II), John Wiley & Sons, New York. pp 601–1181.
- [5] Wilson DE and Ruff S (1999). *The Smithsonian book of North American mammals*. Smithsonian Institution Press, Washington DC. 776 pp.
- [6] Roberts JR, Schmidly DJ, and Bradley RD (2001). *Peromyscus simulus*. *Mammalian Species* **669**:1-3.
- [7] Roberts HR, Schmidly DJ, and Bradley RD (1998). *Peromyscus spicilegus*. *Mammalian Species* **596**:1-4.
- [8] Álvarez-Castañeda ST (2005). *Peromyscus winkelmanni*. *Mammalian Species* **765**:1-3.
- [9] Hoffmeister DF (1981). *Peromyscus truei*. *Mammalian Species* **161**:1-5.
- [10] Schmidly DJ (1974). *Peromyscus attwateri*. *Mammalian Species* **48**:1-3.
- [11] Schmidly DJ (1974). *Peromyscus pectoralis*. *Mammalian Species* **49**:1-3.
- [12] Carleton MD and Lawlor TE (2005). *Peromyscus* from Santa Catalina Island, Sea of Cortez, Mexico: taxonomic identities and biogeographic implications. *J Mammal* **86**: 814-825.
- [13] McClellan DA and Rogers DS (1997). *Peromyscus zarhynchus*. *Mammalian Species* **562**:1-3.
- [14] Lackey JA, Huckaby DG, and Ormiston BG (1985). *Peromyscus leucopus*. *Mammalian Species* **247**:1-10.
- [15] Merritt JF (1978). *Peromyscus californicus*. *Mammalian Species* **85**:1-6.
- [16] Veal R and Caire W (1979). *Peromyscus eremicus*. *Mammalian Species* **118**:1-6.
- [17] Johnson DW and Armstrong DM (1987). *Peromyscus crinitus*. *Mammalian Species* **287**:1-8.
- [18] Shellhammer, HS (1982). *Reithrodontomys raviventris*. *Mammalian Species*. 169:1-3
- [19] Arellano, E. & Rogers, DS (1994). *Reithrodontomys tenuirostris*. *Mammalian Species*. 477:1-3.
